# Supplementary material
Source: publisher figshare collection journal article supplement (https://geolsoc.figshare.com/ndownloader/files/16349954)
Supplement: Supplementary file 1 [file 16349954]

Temperature of ground water [°C]

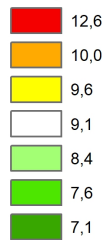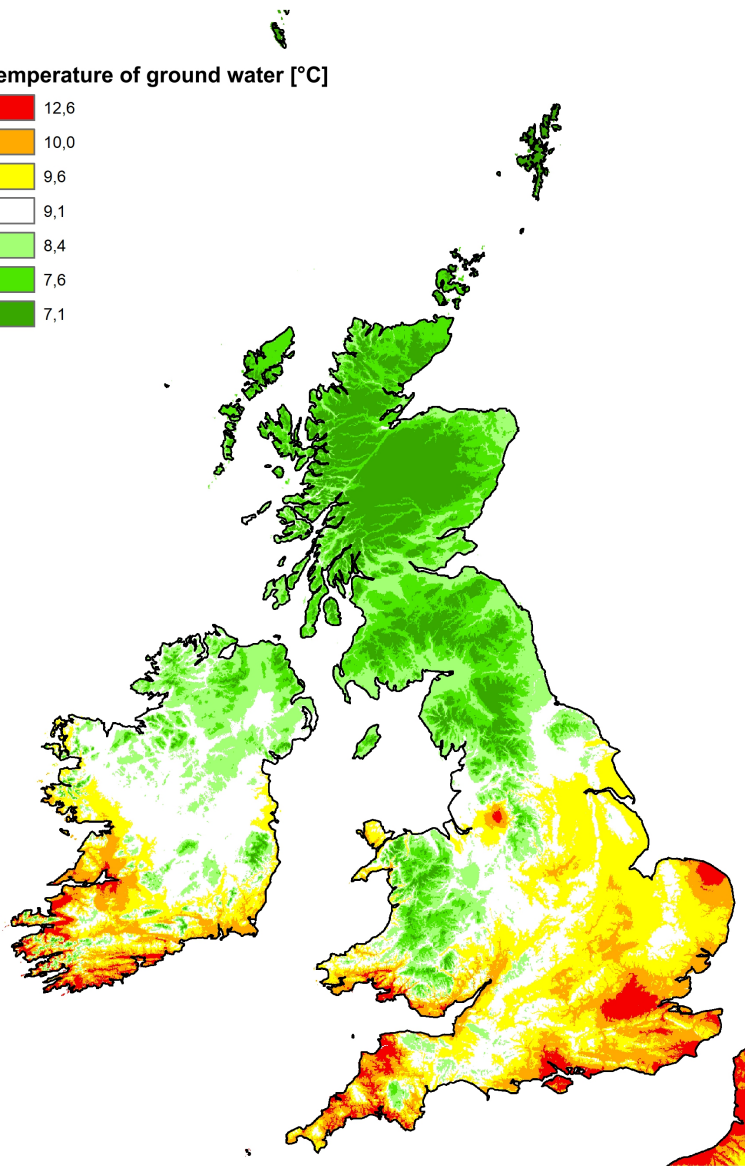

$\delta^{18}\text{O}$  value of groundwater [permil]

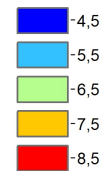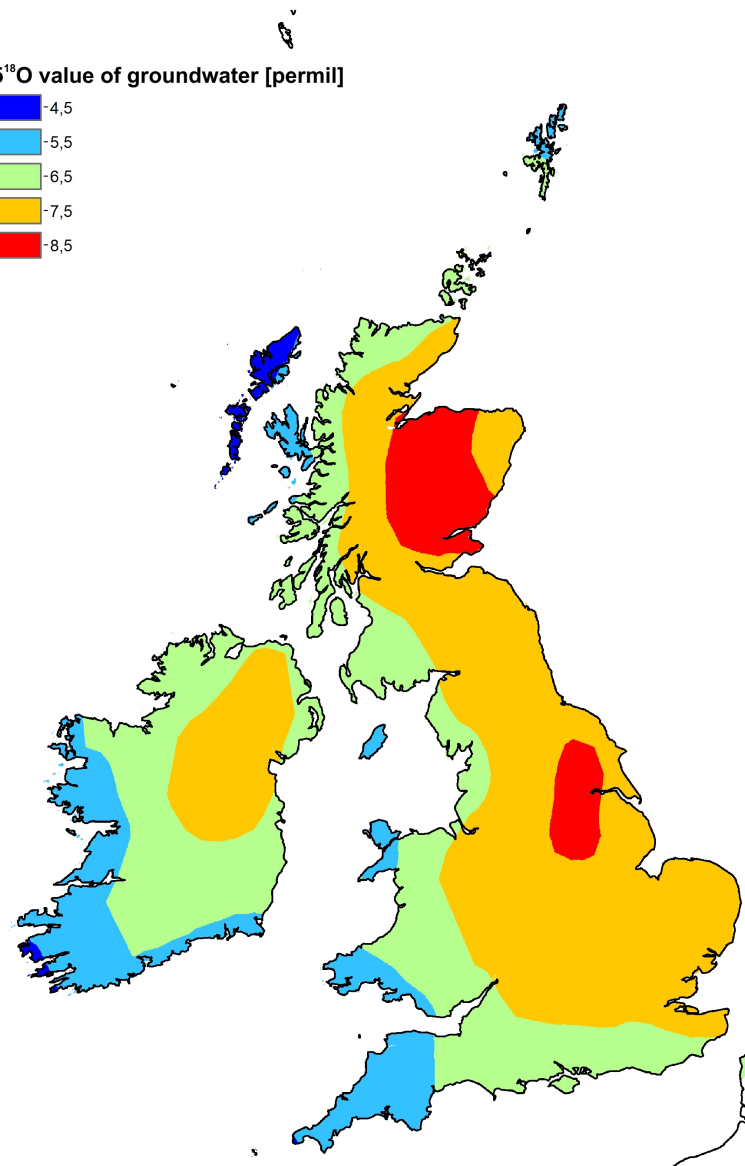

Figure S1 (supplementary material)
